# Supplementary material
Source: ML conference proceedings conference paper supplement (https://proceedings.neurips.cc/paper_files/paper/2019/hash/59b1deff341edb0b76ace57820cef237-Abstract.html)
Supplement: Supplementary file [file 59b1deff341edb0b76ace57820cef237-Supplemental.zip]

## A Appendix

### A.1 Algorithm for Simulating Hybrid System with Stochastic Events

---

**Algorithm 1:** Dynamics simulation for hybrid system

---

**Input** : model parameter  $\theta$ , start time  $t_0$ , end time  $t_N$ , initial state  $\mathbf{z}(t_0)$

**Output** : event sequence  $\mathcal{H}$

initialize  $t = t_0$ ,  $j = 0$ ,  $\mathcal{H} = \{\}$ ,  $\mathbf{z} = \mathbf{z}(t_0)$

**while**  $t < t_N$  **do**

$dt = \text{AdaptiveForwardStepSize}(\mathbf{z}, t, \theta)$

$\triangleright$  from ODE solver

$(\tau_j, \mathbf{k}_j) = \text{SimulateNextEvent}(\mathbf{z}, t, \theta)$

$\triangleright$  sample exponential distribution

**if**  $\tau_j > t + dt$  **then**

$\mathbf{z} = \text{StepForward}(\mathbf{z}, dt, \theta)$

$\triangleright$  1<sup>st</sup> term in Eq. (11)

**else**

$\mathcal{H} = \mathcal{H} \cup \{(\tau_j, \mathbf{k}_j)\}$

$\triangleright$  record event

$j = j + 1$

$dt = \tau_j - t$

$\triangleright$  shrink step size

$\mathbf{z} = \text{StepForward}(\mathbf{z}, dt, \theta)$

$\mathbf{z} = \text{JumpForward}(\mathbf{z}, (\tau_j, \mathbf{k}_j), \theta)$

$\triangleright$  2<sup>nd</sup> term in Eq. (11)

**end**

$t = t + dt$

**end**

---

Note that when an event  $i$  happens within the step size  $dt$  proposed by the ODE solver,  $dt$  needs to shrink so that  $t + dt$  is no larger than  $\tau_i$ .

### A.2 Adjoint Sensitivity Analysis at Discontinuities

When the  $j^{\text{th}}$  event happens at timestamp  $\tau_j$ , the left and right limits of latent variables are related by,

$$\mathbf{z}(\tau_j^+) = \mathbf{z}(\tau_j) + w(\mathbf{z}(\tau_j), \mathbf{k}_j, \tau_j; \theta) \quad (15)$$

where all the time dependent variables are left continuous in time. According to Remark 2 from [45], the left and right limits of adjoint sensitivity variables at a discontinuity satisfy

$$\mathbf{a}(\tau_j) = \mathbf{a}(\tau_j^+) \left( \frac{\partial \mathbf{z}(\tau_j^+)}{\partial \mathbf{z}(\tau_j)} \right). \quad (16)$$

Substituting Eq. (15) in Eq. (16) gives,

$$\begin{aligned} \mathbf{a}(\tau_j) &= \mathbf{a}(\tau_j^+) \left( \mathbf{I} + \frac{\partial w(\mathbf{z}(\tau_j), \mathbf{k}_j, \tau_j; \theta)}{\partial \mathbf{z}(\tau_j)} \right) \\ &= \mathbf{a}(\tau_j^+) + \mathbf{a}(\tau_j^+) \frac{\partial [w(\mathbf{z}(\tau_j), \mathbf{k}_j, \tau_j; \theta)]}{\partial \mathbf{z}(\tau_j)}. \end{aligned} \quad (17)$$

Moreover, Eq. (16) can be generalized to obtain the jump of  $\mathbf{a}_\theta$  and  $\mathbf{a}_t$  at the discontinuities. In the work of Chen et al. [7], the authors define an augmented latent variables and its dynamics as,

$$\mathbf{z}_{\text{aug}}(t) = \begin{bmatrix} \mathbf{z} \\ \theta \\ t \end{bmatrix} (t), \quad \frac{d\mathbf{z}_{\text{aug}}(t)}{dt} = f_{\text{aug}}(\mathbf{z}, t; \theta) = \begin{bmatrix} f(\mathbf{z}, t; \theta) \\ \mathbf{0} \\ 1 \end{bmatrix}, \quad \mathbf{a}_{\text{aug}}(t) = [\mathbf{a} \quad \mathbf{a}_\theta \quad \mathbf{a}_t] (t). \quad (18)$$

Following the same convention, we define the augmented jump function at  $\tau_j$  as,

$$w_{\text{aug}}(\mathbf{z}(\tau_j), \mathbf{k}_j, \tau_j; \theta) = \begin{bmatrix} w(\mathbf{z}(\tau_j), \mathbf{k}_j, \tau_j; \theta) \\ \mathbf{0} \\ 0 \end{bmatrix}. \quad (19)$$

We can verify that the left and right limits of the augmented latent variables satisfy

$$\mathbf{z}_{\text{aug}}(\tau_j^+) = \begin{bmatrix} \mathbf{z}(\tau_j) \\ \theta \\ \tau_j \end{bmatrix} + \begin{bmatrix} w(\mathbf{z}(\tau_j), \mathbf{k}_j, \tau_j; \theta) \\ \mathbf{0} \\ 0 \end{bmatrix} = \mathbf{z}_{\text{aug}}(\tau_j) + w_{\text{aug}}(\mathbf{z}(\tau_j), \mathbf{k}_j, \tau_j; \theta). \quad (20)$$

The augmented dynamics is only a special case of the general Neural ODE framework, and the jump of adjoint variables can be calculated as

$$\mathbf{a}_{\text{aug}}(\tau_j) = \mathbf{a}_{\text{aug}}(\tau_j^+) \left( \frac{\partial \mathbf{z}_{\text{aug}}(\tau_j^+)}{\partial \mathbf{z}_{\text{aug}}(\tau_j)} \right) = [\mathbf{a} \quad \mathbf{a}_\theta \quad \mathbf{a}_t](\tau_j^+) \begin{bmatrix} \mathbf{I} + \frac{\partial w}{\partial \mathbf{z}(\tau_j)} & \frac{\partial w}{\partial \theta} & \frac{\partial w}{\partial \tau_j} \\ \mathbf{0} & \mathbf{I} & \mathbf{0} \\ 0 & 0 & 1 \end{bmatrix}, \quad (21)$$

which is equivalent to Eq. (13).

### A.3 Algorithm for Adjoint Method with Discontinuities

---

**Algorithm 2:** Algorithm for computing the loss function and its derivatives

---

**Input** : model parameter  $\theta$ , start time  $t_0$ , end time  $t_N$ , initial state  $\mathbf{z}(t_0)$ , event sequence  $\mathcal{H}$

**Output** : loss function  $\mathcal{L}$  and derivatives  $d\mathcal{L}/d\mathbf{z}(t_0) = \mathbf{a}(t_0)$ ,  $d\mathcal{L}/d\theta = \mathbf{a}_\theta(t_0)$ ,

$$d\mathcal{L}/dt_0 = \mathbf{a}_t(t_0)$$

initialize  $t = t_0$ ,  $\mathbf{z} = \mathbf{z}(t_0)$

**while**  $t < t_N$  **do**

$dt = \text{AdaptiveForwardStepSize}(\mathbf{z}, t, \theta)$  ▷ from ODE solver

$(\tau_j, \mathbf{k}_j) = \text{GetNextEvent}(\mathcal{H}, t)$  ▷ find next event in sequence

**if**  $\tau_j > t + dt$  **then**

$\mathbf{z} = \text{StepForward}(\mathbf{z}, dt, \theta)$  ▷ 1<sup>st</sup> term in Eq. (11)

**else**

$dt = \tau_j - t$  ▷ shrink step size

$\mathbf{z} = \text{StepForward}(\mathbf{z}, dt, \theta)$

$\mathbf{z} = \text{JumpForward}(\mathbf{z}, (\tau_j, \mathbf{k}_j), \theta)$  ▷ 2<sup>nd</sup> term in Eq. (11)

**end**

$t = t + dt$

**end**

$\mathcal{L} = \mathcal{L}(\{\mathbf{z}(t_i)\}, \{\mathbf{z}(\tau_j)\}; \theta)$  ▷ compute loss function

initialize  $t = t_N$ ,  $\mathbf{a} = \partial \mathcal{L} / \partial \mathbf{z}(t_N)$ ,  $\mathbf{a}_\theta = 0$ ,  $\mathbf{a}_t = \mathbf{a} \cdot f(\mathbf{z}(t_N), t_N; \theta)$ ,  $\mathbf{z} = \mathbf{z}(t_N)$

**while**  $t > t_0$  **do**

$dt = \text{AdaptiveBackwardStepSize}(\mathbf{z}, \mathbf{a}, \mathbf{a}_\theta, \mathbf{a}_t, t, \theta)$  ▷ from ODE solver

$(\tau_j, \mathbf{k}_j) = \text{GetPreviousEvent}(\mathcal{H}, t)$  ▷ find previous event in sequence

**if**  $\tau_j < t - dt$  **then**

$\mathbf{z}, \mathbf{a}, \mathbf{a}_\theta, \mathbf{a}_t = \text{StepBackward}(\mathbf{z}, \mathbf{a}, \mathbf{a}_\theta, \mathbf{a}_t, dt, \theta)$  ▷ 1<sup>st</sup> term in Eq. (11), Eq. (9)

**else**

$dt = t - \tau_j$  ▷ shrink step size

$\mathbf{z}, \mathbf{a}, \mathbf{a}_\theta, \mathbf{a}_t = \text{StepBackward}(\mathbf{z}, \mathbf{a}, \mathbf{a}_\theta, \mathbf{a}_t, dt, \theta)$

$\mathbf{z}, \mathbf{a}, \mathbf{a}_\theta, \mathbf{a}_t = \text{JumpBackward}(\mathbf{z}, \mathbf{a}, \mathbf{a}_\theta, \mathbf{a}_t, (\tau_j, \mathbf{k}_j), \theta)$  ▷ 2<sup>nd</sup> term in Eq. (11), Eq. (13)

**end**

$t = t + dt$

**end**

---
